# Integration of Factors Controlling Vascular Tone

## Overview

Geoffrey Burnstock, D.Sc.

FOR many years, studies of neurohumoral control of the vasculature have been dominated by consideration of the role of catecholamines released from sympathetic perivascular nerves and from the adrenal medulla into the bloodstream. New and improved techniques in immunohistochemistry, electron microscopy, electrophysiology, and pharmacology, introduced in recent years, have led to a wealth of discoveries that have profoundly reshaped our understanding of the autonomic nervous system.<sup>1,2</sup> Although the classic view involved antagonistic cholinergic and adrenergic nerves, many new putative neurotransmitters have been proposed in the last few years. Neuromodulatory mechanisms have been recognized, including prejunctional inhibition or enhancement of transmitter release, postjunctional modulation of transmitter action, and the secondary involvement of locally synthesized hormones and prostaglandins. The existence of more than one transmitter substance in some nerves, or cotransmission, is now also widely recognized.<sup>3,4</sup>

Knowledge of local humoral regulation of blood flow has also rapidly progressed in recent years. This arose from the seminal discovery that endothelial cells, which form the innermost layer of blood vessels, play a crucial role in the vasodilatory response of the vessel to acetylcholine (ACh)<sup>5</sup> and to other substances.<sup>6</sup> The considerable interest in vascular control mechanisms arising from these studies has led to the concept of a dual regulation of blood vessel tone, whereby both nerves and the endothelium are involved.<sup>7,8</sup>

The current review discusses these recent discoveries in neurohumoral control of the vasculature, and sug-

gests a new framework for considering changes in disease.

## Perivascular Nerves

The vascular neuroeffector junction consists of varicose nerve fibers within a plexus at the adventitial-medial border. Transmitter is released "*en passage*" from varicosities to reach vascular smooth muscle cells that are in electrical continuity with each other *via* gap junctions.<sup>9,10</sup> The varicosities do not have a fixed relationship with particular smooth muscle cells, and the junctional cleft varies between about 60 nm and as much as 2  $\mu$ m in some large arteries; muscle cells rarely (if at all) have postjunctional specializations. This means that the vascular neuromuscular junction differs in a significant way from "synapses" at the motor endplate in striated muscle or within ganglia, where there is a fixed relationship with both pre- and postjunctional specialization. The variable geometry of the vascular neuromuscular junction means that neuromodulation is an important feature. A neuromodulator is defined as a substance that modifies the process of neurotransmission. It may act as a prejunctional modulator by decreasing or increasing the amount of transmitter released by the nerve varicosity, or it may act as a postjunctional modulator by altering the time course or extent of action of the neurotransmitter. Neuromodulators may be circulating neurohormones; local agents, such as prostanooids, bradykinin, or histamine; or neurotransmitter substances released from other nerves nearby or even from the same nerve varicosity.

## Multiplicity of Transmitters: Cotransmission and Chemical Coding

For more than 50 yr, the only transmitters considered in perivascular nerves were noradrenaline (NA) and ACh. Since the discovery of nonadrenergic, noncholinergic nerves in the early 1960s, more than 12 new

Received from the Department of Anatomy and Developmental Biology and Centre for Neuroscience, University College London, London, England. Accepted for publication July 13, 1993.

Address reprint requests to Professor Burnstock: Department of Anatomy and Developmental Biology and Centre for Neuroscience, University College London, Gower Street, London, WC1E 6BT England.

## DUAL CONTROL OF VASCULAR TONE

chemical messengers have been identified, including monoamines, purines, amino acids, polypeptides, and nitric oxide (table 1).

The concept of cotransmission, *i.e.*, that nerves synthesize, store, and release more than one transmitter, was first proposed in 1976.<sup>3</sup> This hypothesis is now generally accepted.<sup>4,11-16</sup>

Although, at first sight, the multiplicity of transmitters released in various computations from different perivascular nerves appears formidable and unnecessary, a pattern is now emerging that clarifies the situation. This is the idea that autonomic nerves have a "chemical coding," *i.e.*, individual neurones contain a particular combination of transmitter substances, have processes that project to identifiable target sites, and have defined central connections. This concept has been developed most fully for the enteric nervous system,<sup>17</sup> but it also applies to perivascular nerves.

### Sympathetic Perivascular Nerves

There is now a substantial body of evidence showing that NA and ATP act as cotransmitters, being released from sympathetic nerves in variable proportions depending on the tissue and species.<sup>18</sup> Most of the early and more detailed studies were made on the vas deferens,<sup>19</sup> but many studies of sympathetic cotransmission, involving adenosine 5'-triphosphate (ATP) and NA, have now also been carried out on a number of different blood vessels,<sup>20</sup> including rat tail artery,<sup>21,22</sup> rabbit ear artery,<sup>23-25</sup> dog basilar artery,<sup>26</sup> mesenteric artery,<sup>27-32</sup> rabbit pulmonary artery,<sup>33</sup> guinea pig and rabbit saphenous artery,<sup>34-36</sup> and rabbit hepatic artery.<sup>37</sup> Sympathetic cotransmission involving NA and ATP has also been shown in the circulation of skeletal muscle,<sup>38</sup> cat intestine,<sup>39</sup> kidney,<sup>40</sup> dog skin,<sup>41</sup> and the pithed rat.<sup>42,43</sup>

Evidence for purinergic cotransmission includes: block on the prazosin-resistant component of the response to sympathetic nerve stimulation by the ATP antagonist arylazido aminopropionyl-ATP (ANAPP<sub>3</sub>), or by the selective desensitizer of the ATP (P<sub>2X</sub>-purinoceptor) by  $\alpha,\beta$ -methylene ATP; release of ATP during nerve stimulation, which is prevented by tetrodotoxin, guanethidine, or destruction of sympathetic nerves by 6-hydroxydopamine, but is unaffected by selective depletion of NA by reserpine; and mimicry of excitatory junction potentials (EJPs) by ATP, but not by NA.

The purinergic component gives an optimal response during short bursts of sympathetic nerve stimulation (1 s or less), but the traditional period of nerve stim-

**Table 1. Established and Putative Transmitters: Perivascular Nerves**

|                                                 |
|-------------------------------------------------|
| Noradrenaline (NA)                              |
| Acetylcholine (ACh)                             |
| Adenosine 5'-triphosphate (ATP)                 |
| 5-Hydroxytryptamine (5-HT)                      |
| Dopamine (DA)                                   |
| Enkephalin-dynorphin (ENK-DYN)                  |
| Vasoactive intestinal polypeptide (VIP)         |
| Peptide histidine isoleucine (PHI)              |
| Substance P (SP)                                |
| Gastrin-releasing peptide (GRP)                 |
| Somatostatin (SOM)                              |
| Neurotensin (NT)                                |
| Vasopressin (VP)                                |
| Cholecystokinin-gastrin (CCK-GAS)               |
| Neuropeptide Y-pancreatic polypeptide (NPY-PPP) |
| Galanin (GAL)                                   |
| Angiotensin (ANG)                               |
| Adrenocorticotrophic hormone (ACH)              |
| Calcitonin gene-related peptide (CGRP)          |
| Nitric oxide (NO)                               |

ulation in experimental *in vitro* preparations is 30 s or more, under which conditions the NA component dominates the mechanical responses.<sup>44</sup>

The proportions of the cotransmitters NA and ATP vary considerably between different vessels. For example, ATP is the major component of sympathetic cotransmission in the rabbit saphenous artery, intestinal arterioles,<sup>45,46</sup> and mesenteric arteries,<sup>35</sup> but it appears to be a relatively minor component in rabbit ear artery and rat tail artery, in which the relationship between EJPs and mechanical responses is more difficult to demonstrate. A model depicting sympathetic cotransmission is shown in figure 1. The purinergic component of sympathetic cotransmission is selectively affected by the dihydropyridines, nifedipine and Bay K 8644.<sup>48,49</sup>

Recent studies in our laboratory have shown that, in rabbit coronary vessels, in contrast to other vessels in which NA and ATP cause synergistic constriction *via*  $\alpha_1$ -adrenoceptors and P<sub>2X</sub>-purinoceptors, respectively, the predominant effect of ATP is vasodilatation *via* P<sub>2Y</sub>-purinoceptors.<sup>50</sup> Because, in this vessel, the predominant effect of NA is vasodilatation *via*  $\beta$ -adrenoceptors, this is consistent with the synergism that appears to be characteristic of cotransmission.

Neuropeptide Y (NPY) is also stored in, and released from, sympathetic nerves,<sup>51,52</sup> but, in many vessels, it has little direct postjunctional action.<sup>53,54</sup> However, it

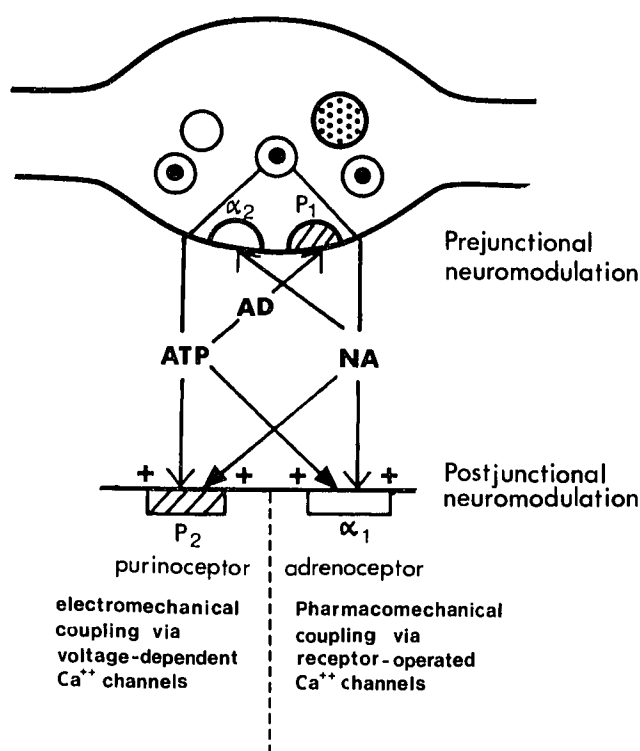

Fig. 1. Diagram showing that adenosine 5'-triphosphate (ATP) and noradrenaline (NA) are released as cotransmitters from the sympathetic nerves supplying the vas deferens and some blood vessels. ATP acts on  $P_2$ -purinoceptors on the smooth muscles to initiate excitatory junction potentials, action potentials, and a fast initial contraction involving electromechanical coupling *via* voltage-dependent  $Ca^{2+}$  channels. In contrast, NA acts on  $\alpha_1$ -adrenoceptors to produce the second slower phase of the contraction by pharmacomechanical (or at least spike-independent) coupling *via* receptor-operated  $Ca^{2+}$  channels. Prejunctional  $\alpha_2$ -adrenoceptors and  $P_1$ -purinoceptors can reduce transmitter release when activated by NA and adenosine (AD), respectively (prejunctional neuromodulation), but NA and ATP enhance each other's actions (postjunctional neuromodulation). (Adapted with permission from Burnstock.<sup>47</sup>)

has potent prejunctional actions reducing the release of NA and ATP, and postjunctional actions enhancing the actions of NA and ATP.<sup>19,55,56</sup> The geometry of particular sympathetic neuromuscular junctions appears to influence the type of neuromodulation, *i.e.*, with wide junctions, postjunctional potentiation by NPY dominates; however, narrow clefts favor prejunctional inhibition by NPY.<sup>57</sup> Neuropeptide Y has direct vasoconstrictor actions in some vessels—for example, those in heart, brain, spleen, and skeletal muscle—but its origin may be from intrinsic or local neurons, rather than sympathetic nerves.

In a study of blood vessels in guinea pig skin, a differential chemical coding has been demonstrated, *i.e.*, although sympathetic nerves in the distributing arteries contain NPY and NA, in the smaller arteries, they contain dynorphin (DYN), as well as NPY and NA; and in precapillary arteries, only DYN and NA are present.<sup>58</sup>

5-Hydroxytryptamine (5-HT) immunofluorescent nerves have been localized in a number of vessels.<sup>9,59</sup> However, it seems that, for the most part, 5-HT is not synthesized and stored in separate nerves, but is taken up, stored in, and released as a "false transmitter" from sympathetic nerves.<sup>60</sup>

#### Parasympathetic Perivascular Nerves

In the salivary gland of the cat, vasoactive intestinal polypeptide (VIP) appears to be stored together with ACh in parasympathetic nerves, probably in separate vesicles. During low-frequency stimulation, ACh is released to increase salivary secretion from acinar cells, and, also, to elicit some minor dilatation of blood vessels in the gland.<sup>61,62</sup> Vasoactive intestinal polypeptide is released from the same nerves, especially at high stimulation frequencies, to produce marked dilatation and, although it has no direct effect on acinar cells, it acts as a neuromodulator to substantially enhance the postjunctional effect of ACh on acinar cell secretion, and to increase the release of ACh from the nerve varicosities *via* prejunctional receptors (fig. 2). Vasoactive intestinal polypeptide is a potent vasodilator of many vessels, notably penile vessels; it appears to play a major role in erection.

#### Sensory-Motor Perivascular Nerves

Sensory nerves have been claimed to use substance P (SP),<sup>63–65</sup> calcitonin gene-related peptide (CGRP),<sup>66,67</sup> and ATP.<sup>68–71</sup> Calcitonin gene-related peptide and SP have been shown to coexist in sensory nerve terminals in perivascular nerves,<sup>72,73</sup> and, with the use of colloidal gold particles of different sizes, they have been shown to coexist in the same large granular vesicles.<sup>74</sup> By analogy with other systems, it seems likely that ATP coexists in different proportions with these two peptides, perhaps cooperating in axon reflex vasodilatation<sup>75</sup> (fig. 3). Because the role of these nerves during the axon reflex to many organs<sup>76</sup> is motor rather than sensory, they have been termed "sensory-motor nerves," to distinguish them from the other subpopulation of afferent fibers that have an entirely sensory role and whose terminals contain few vesicles and a predominance of mitochondria.<sup>2</sup>

## DUAL CONTROL OF VASCULAR TONE

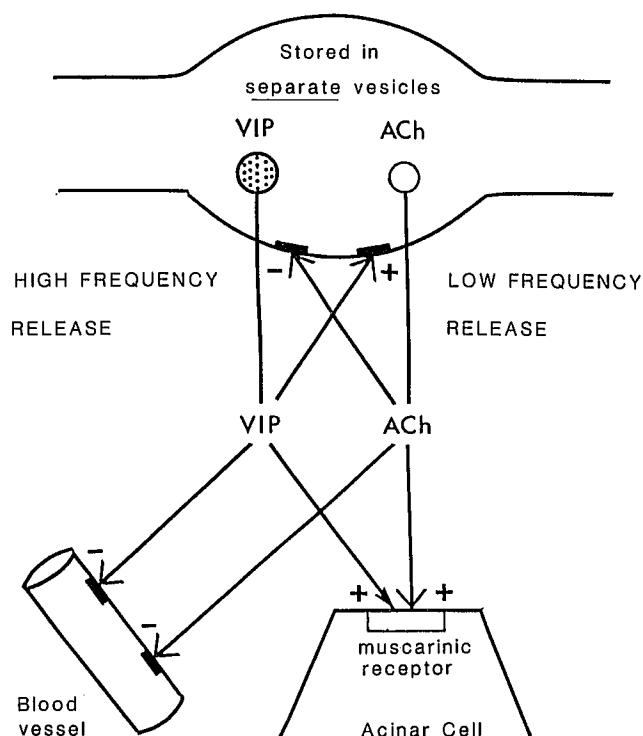

Fig. 2. A classic transmitter acetylcholine (ACh) coexists with vasoactive intestinal polypeptide (VIP) in parasympathetic nerves supplying the cat salivary gland. ACh and VIP are stored in separate vesicles; they can be released differentially at different stimulation frequencies to act on acinar cells and glandular blood vessels. Cooperation is achieved by selective release of ACh at low-impulse frequencies, and of VIP at high frequencies. Pre- and postjunctional modulation is indicated. (Reprinted with permission from Burnstock.<sup>47</sup>)

Prejunctional modulation of sensory-motor nerve-mediated vasodilatation of the rat mesenteric arterial bed by adenosine has been demonstrated.<sup>77</sup>

#### Perivascular Nerves Arising from Intramural Neurons

Little is known about the physiologic roles or the pharmacology of intrinsic neurones of the heart, because it is so difficult to study this *in situ*. However, a novel culture preparation from the atria of newborn guinea pigs has been developed in our laboratory to study the intrinsic innervation of the heart under conditions of unequivocal extrinsic denervation.<sup>78,79</sup> Some of these neurones show immunofluorescence for NPY, some for 5-HT, and some for variable mixtures of both transmitter substances. Projections of these neurones *in situ* form perivascular plexuses in small-resistance

coronary vessels.<sup>80</sup> Both NPY and 5-HT are potent vasoconstrictors of coronary vessels and may have synergistic actions. Nitric oxide synthase has also been shown to be localized in a subpopulation of intrinsic cardiac neurones.<sup>81</sup>

Few studies have been carried out on the projections of intrinsic neurones to blood vessels in other organs, but intrinsic enteric neurones are known to supply some vessels in the gut and mesentery, and it is well known that monoamine-containing neurones in the brain contribute to the innervation of some cerebral vessels.<sup>9</sup> Nitric oxide appears to be a transmitter in cerebral and penile vessels, perhaps derived from local neurones.<sup>82</sup>

#### Endothelium

Since 1980, when Furchgott and Zawadzki<sup>5</sup> first reported that the vasodilatation response to ACh requires the presence of an intact endothelium, the role of the endothelium in the regulation of vascular tone has attracted considerable interest.<sup>6,83</sup> Action on endothelial receptors by a number of vasoactive substances stimulates the production of endothelium-derived relaxing factors (EDRF) or constricting factors (EDCF) and prostaglandins. These subsequently modify vascular tone by causing contraction or relaxation of the vascular smooth muscle. Endothelium-derived relaxing factor has been identified as nitric oxide,<sup>84,85</sup> and the peptide endothelin is considered one of the constricting factors.<sup>86</sup> It should be noted that there is considerable heterogeneity in the endothelium-dependent responses of mammalian blood vessels, with variations between arteries and veins and between different vascular beds. It is likely that such variations would be physiologically useful, particularly with regard to ensuring that the blood supply to the heart and brain are protected under a variety of different conditions.<sup>87</sup>

#### Endothelium-Mediated Vasodilatation

In addition to ACh, endothelium-dependent vasodilatation has been shown to occur in response to ATP, adenosine 5'-diphosphate (ADP), arachidonic acid, SP, neurokinin A (NKA), 5-HT, bradykinin, histamine, neurotensin, vasopressin (VP), angiotensin II (AgII), and thrombin.<sup>88</sup> Different subtypes of the receptors to such vasoactive substances occur on the endothelium and on the vascular smooth muscle. For example, P<sub>2X</sub>-

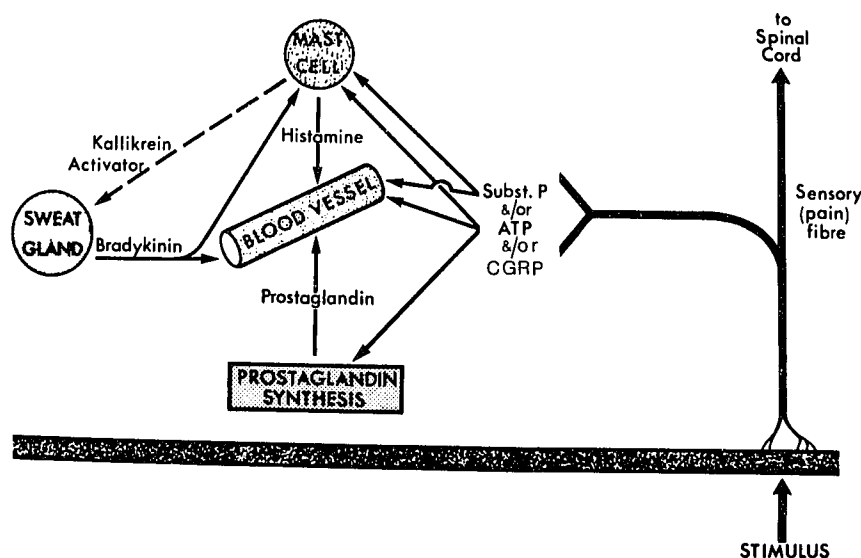

Fig. 3. Diagram showing the basis of the "axon reflex" in the skin leading to vasodilatation and inflammation. It is suggested that calcitonin gene-related peptide (CGRP), substance P (SP), and adenosine 5'-triphosphate (ATP) are released during antidromic activation of sensory collaterals. (Adapted with permission from Burnstock.<sup>73</sup>)

purinoceptors are present on the vascular smooth muscle, and are acted on by ATP released from perivascular nerves to produce vasoconstriction; and ATP can cause vasodilatation *via*  $P_{2U}$ -purinoceptors on the endothelial cells.<sup>89,90</sup>

It is clear that neurotransmitters released from perivascular nerves have direct access to vascular smooth muscle cell receptors to produce a response. It is neither likely nor desirable that the same neurotransmitter can diffuse through the media and basal lamina of a large blood vessel (without degradation) to act on endothelial receptors and produce the opposite effect. To establish that endothelium-dependent responses have a role to play in the control of vascular tone in the intact organism, it is necessary to identify the source of the vasoactive substances that act on the endothelial receptors. For some substances, a readily available source is the blood. In the case of ACh and SP, however, circulating levels are low because of their rapid breakdown. The possibility that endothelial cells themselves may be the source of such substances was first proposed in 1985, when Parnavelas *et al.*<sup>91</sup> reported that choline acetyltransferase, the enzyme responsible for the synthesis of ACh, could be localized in endothelial cells lining capillaries and small vessels in the rat cortex. Since this time, using the same technique of immunocytochemical staining combined with electron microscopy, ChAT, SP, 5-HT, VP, and AgII have all been localized in endothelial cells from a variety of

blood vessels.<sup>92-95</sup> In addition, SP levels have been measured in endothelium isolated from cerebral arteries and aorta.<sup>96</sup> Others have also demonstrated that endothelial cells have the capability of synthesizing AgII and histamine.<sup>97,98</sup>

Experiments have been carried out to investigate whether certain stimuli can cause the release of vasoactive substances from their endothelial stores, thus providing evidence for a physiologic mechanism for the endothelium-dependent responses to such stimuli to occur. 5-Hydroxytryptamine, ATP, SP, and ACh, all of which are present in coronary endothelial cells, have been shown to be released after hypoxic perfusion of the Langendorf heart preparation from the rat.<sup>93,94,99</sup> Hypoxic vasodilatation has been shown to be endothelium-dependent. In the perfused rat hindlimb, increased flow causes the release of SP, which has been localized in the endothelial cells of the rat femoral artery.<sup>100</sup> After removal of the endothelium by perfusion with air bubbles,<sup>101</sup> increased flow no longer induced the release of SP, although denervation of the hindlimb vasculature of SP-containing nerves by capsaicin had no effect on flow-induced SP release.<sup>102</sup> Substance P has also been shown to be released from columns of endothelial cells grown on microcarrier beads after increased flow.<sup>103</sup> This supports the view that the source of the SP is endothelial cells. Thus, SP and other vasoactive substances within endothelial cells, by their release, contribute to flow-induced vasodilatation, which is known to be an endothelium-dependent response.

## DUAL CONTROL OF VASCULAR TONE

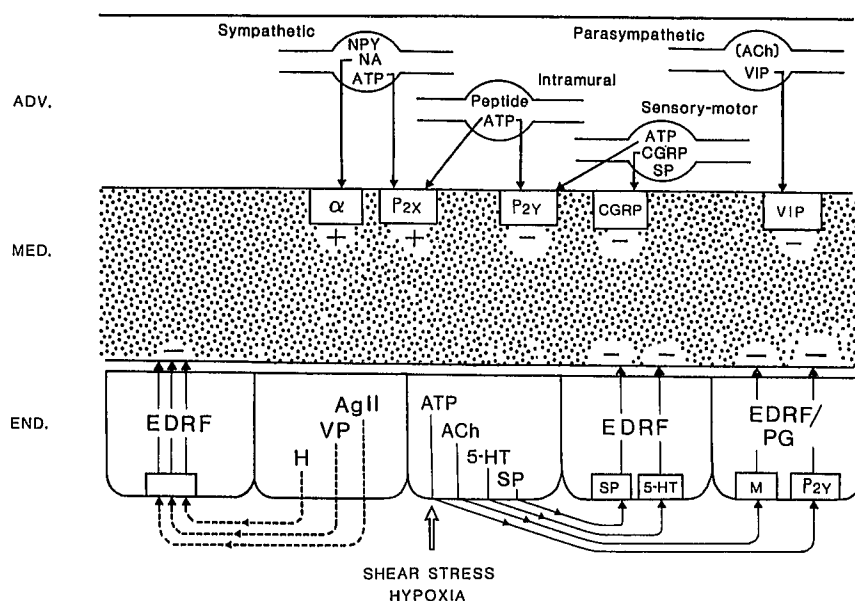

Fig. 4. Regulation of vascular tone by perivascular nerves and endothelial cells. Neuropeptide Y (NPY), noradrenaline (NA), adenosine 5'-triphosphate (ATP), calcitonin gene-related peptide (CGRP), substance P (SP), and vasoactive intestinal polypeptide (VIP) can be released from nerve varicosities in the adventitia (ADV) to act on receptors in the media (MED), causing vasoconstriction or vasodilatation. ATP, ACh, 5-hydroxytryptamine (5-HT), and SP, released from endothelial cells (END) by shear stress or hypoxia, act on their receptors on endothelial cells to cause a release of EDRF or prostaglandins (PG), which, in turn, act on the smooth muscle to cause relaxation. Angiotensin II (AgII), vasopressin (VP), and histamine (H) are also contained in, and may be released from, subpopulations of endothelial cells. In areas denuded of endothelial cells, opposite effects may be produced by receptors on the smooth muscle cells; for example, via P<sub>2X</sub> and P<sub>2Y</sub> purinoceptors and muscarinic receptors (M). (Adapted from Burnstock.<sup>149</sup>)

### Endothelium-Mediated Vasoconstriction

It has been proposed that the endothelium mediates vasoconstriction *via* production of an EDCF in response to various chemical and physical stimuli, such as NA, thrombin, high extracellular potassium, hypoxia, and stretch.<sup>104-108</sup> In response to stretch, endothelial Ca<sup>2+</sup> channels have been described and suggested to operate as mechanotransducers.<sup>109</sup> Thus, the role of endothelial cells is twofold, sensory and effector, such that vasoconstriction may occur independently of the action of extraneous vasoactive substances.

Although the nature of EDCF is still uncertain, and appears to be different in blood vessels of different anatomic origin, at least three different classes of endothelial vasoconstrictor substances have been recognized: (1) metabolites of arachidonic acid; (2) a polypeptide-like factor (or factors) produced by cultured endothelial cells; and (3) a still-unidentified diffusible factor released from anoxic/hypoxic endothelial cells.<sup>110</sup> A polypeptide produced by the endothelium in response to various stimuli was demonstrated using cultured bovine aortic endothelial cells, and could represent the EDCF. On release, this was shown to be a potent vasoconstrictor that was unaffected by inhibitors of receptors for known vasoactive substances and by inhibitors of prostaglandin synthesis, but was abolished by several treatments (sodium dodecyl sulphate,

trypsin, alkali, or acid hydrolysis) known to affect proteins.<sup>111-113</sup>

An endothelium-derived 21-residue vasoconstrictor peptide, endothelin, has been isolated from porcine aortic endothelial cells, and the complementary DNA of its precursor, preproendothelin, has been cloned and sequenced.<sup>86</sup> It has been shown to be a potent constrictor in, for example, the rabbit skin microvasculature,<sup>114</sup> isolated human resistance vessels,<sup>115</sup> and rat mesenteric resistance vessels.<sup>116</sup> Endothelin and ATP, but not VIP, have been shown to be released from isolated aortic endothelial cells exposed to increased flow.<sup>117</sup> Receptors for endothelin have been localized by autoradiography on cultured rat aortic smooth muscle cells,<sup>118</sup> rat kidney,<sup>119</sup> and human and porcine coronary arteries.<sup>120</sup>

A schematic model of the neural and endothelial factors involved in control of vascular tone is illustrated in figure 4.

### Changes in Vascular Control in Aging and Disease

Because perivascular nerves are separated from endothelial cells by vascular smooth muscle, the possibility of trophic interactions between perivascular nerves and endothelial cells has received little direct

investigation. However, studies of the vasculature in disease, and after denervation or mechanical injury, do provide some indication that such interactions may occur.

Perivascular nerve varicosities have been demonstrated in close apposition to endothelial cells in capillaries; this raises the possibility of direct trophic interactions between nerves and endothelial cells in the microvasculature. Adenosine can be formed from the extracellular breakdown of ATP released from nerves. Chronic inhibition of adenosine uptake with dipyridamole has been shown to cause proliferation of capillary endothelium and increased capillary density in skeletal muscle and heart.<sup>121</sup> Furthermore, it has been suggested that neuropeptides may have a role in controlling neurochemical differentiation, cell proliferation, hypertrophy, and regeneration.<sup>122</sup> Such interactions require further investigation in the context of vascular cell biology.

#### *Changes in Perivascular Nerves in Development and Aging*

In a study of the changes in density of sympathetic adrenergic nerves in blood vessels of the rabbit, using image analysis quantitation, Cowen *et al.*<sup>123</sup> recognized that the pattern of change with age varied considerably between different vessels. Although the early stages of development of vascular innervation were similar in all the vessels studied, and reached an initial peak density at about 6 weeks after birth, the density of innervation of some vessels (*e.g.*, femoral artery) declined thereafter; other vessels (*e.g.*, renal artery) reached peak density at 6 months and then rapidly declined; however, in the basilar artery, density of innervation continued to increase into old age (3 yr).

Changes in the development of peptide-containing perivascular nerves of guinea pig vessels were studied between 6 weeks *in utero* and old age, and compared with changes in perivascular adrenergic nerves.<sup>124</sup> Again, variation in the pattern of development of perivascular nerves in different vessels was demonstrated. In addition, in mesenteric and carotid arteries, although adrenergic nerve density reached a peak 4 weeks after birth and declined thereafter, the peptide-containing nerves (VIP, CGRP, and SP) reached a peak at birth and declined thereafter to about half of maximum density in old age, raising the possibility that perivascular neuropeptides may play a trophic role in early development.

In another study from our laboratory, it has been shown that, although there is a decrease in expression of vasoconstrictor, cerebrovascular neurotransmitters (NA and 5-HT) in aging rats, there is an increase in vasodilator neurotransmitters (VIP and CGRP).<sup>125</sup>

#### *Changes in Perivascular Nerves After Trauma, Surgery, and Chronic Exposure to Drugs*

It has been shown that, 2–8 weeks after sympathetic and sensory denervation of the rabbit ear artery, endothelium-dependent relaxation responses to methacholine are significantly depressed.<sup>126</sup> The reduction in response was not caused by any impairment of the ability of the muscle to relax, because the maximal relaxation to sodium nitroprusside (an endothelium-independent agent) was unaffected by denervation. Long-term sympathetic denervation in rabbits resulted in an increase in the sensitivity of cerebral arteries to hypercapnia, hypoxia, and 5-HT.<sup>127</sup> Although morphologic changes in the endothelial cells were not detected under these conditions,<sup>128</sup> it is possible that alterations in the endothelial control of the cerebral vasculature after sympathetic denervation contributed to this effect. In contrast, when the endothelium of the dog coronary artery was mechanically injured without disruption of the elastic lamina, neuron-specific enolase-positive nerve fibers were increased in number at both 1 and 3 months.<sup>129</sup> An increased density of SP-containing nerve fibers was also observed in the dog coronary artery 3 months after mechanical injury to the endothelium. Surgical sympathectomy or long-term adrenoceptor blockade by propranolol are claimed to prevent or reduce the induction of atherosclerosis by diet.<sup>130</sup> It has been proposed that NPY and NA in cerebral perivascular nerves, which increase during the development of hypertension in rats,<sup>131</sup> are involved in protection against disruption of the blood–brain barrier and cerebral hemorrhage caused by hypertension. Sympathetic denervation before the development of hypertension results in increased incidence of stroke and increased permeability of the blood–brain barrier.

Unilateral removal of the superior cervical ganglion (SCG) results in the reinnervation of denervated cerebral vessels by sprouting nerves from the contralateral SCG.<sup>132</sup> Other marked compensatory changes after superior cervical ganglionectomy include increased SP levels in the ipsilateral iris and ciliary body,<sup>133</sup> increased CGRP content of pial vessels,<sup>134</sup> and increased expression of NPY in nonadrenergic VIP-containing nerves in the cerebral vasculature.<sup>135</sup> Long-term chem-

ical sympathectomy of developing rats, induced by chronic guanethidine treatment, leads to increased brightness and density of CGRP-positive immunofluorescent nerves innervating blood vessels.<sup>136</sup> In late pregnancy, sympathetic innervation of guinea pig uterine blood vessels exhibits a remarkable switch from adrenergic vasoconstrictor to cholinergic vasodilator control,<sup>137</sup> although ultrastructural studies of the guinea pig uterine artery did not show any degeneration of serotonergic or peptidergic (NPY, VIP, SP, and CGRP)-containing nerves in late pregnancy.<sup>138</sup> Four-week treatment with estrogen, but not progesterone, leads to a marked reduction in the density and varicosity diameters of 5-HT-containing nerves supplying the rabbit basilar artery.<sup>139</sup> In view of the possible involvement of 5-HT in the pathogenesis of headache, this finding indicates that contraceptive pills with a high estrogen content may be contraindicated in women prone to migraine attacks. The effect of crush lesions on perivascular noradrenergic nerves has shown differential rates of reinnervation in different blood vessels, indicating the presence of characteristic levels of local neurotrophic activity.<sup>123</sup>

#### *Changes in Perivascular Nerves in Hypertension*

The distribution of NA and NPY in nerves was compared during the early development of cerebral vessels in normotensive rats and spontaneously hypertensive rats (SHR) before and after the time when hypertension becomes apparent at about 5 weeks of age.<sup>131</sup> Three interesting findings emerged from this study. First, the levels of both NA and NPY were significantly higher in cerebral perivascular sympathetic nerves in SHR compared with normotensive rats. Second, in both normotensive rats and SHR, there was a discrepancy between the time course of changes in the expression of NA and NPY, *i.e.*, the density of NA-fluorescent fibers increased rapidly between 4 and 6 weeks, but NPY-immunofluorescent nerves showed a rapid increase between 6 and 8 weeks (fig. 4). Because NA and NPY coexist in sympathetic perivascular nerves, this shows that the expression of cotransmitters is not necessarily identical. And, third, the increase in NA and NPY in SHR does not occur in the sympathetic nerve cell bodies in the superior cervical ganglion from which the cerebral perivascular nerves arise.

#### *Diabetes*

Perivascular nerves in penile vessels containing VIP and ACh were shown to be damaged or lost in strep-

tozotocin-diabetic rats and in diabetic impotent men.<sup>140-142</sup> A reduction in the expression of VIP and 5-HT, but not NPY and NA, has been demonstrated in perivascular nerves supplying the cerebral blood vessels of streptozotocin-induced diabetic rats.<sup>143</sup>

Attenuation of endothelial-mediated vasodilatation has been claimed in diabetic vessels, perhaps because of reduced release of EDRF.<sup>144</sup>

#### *Atherosclerosis*

Although endothelial-mediated vasodilatation has been shown to be seriously attenuated in heavily lesioned vessels, such as aorta and carotid artery, in other vessels in early atherosclerosis a compensatory increase in endothelium-mediated vasodilatation has been reported.<sup>145,146</sup>

#### *Chronic Hypoxia*

In a recent study of the effect of chronic hypoxia on the control of endothelial vasoactive substances, it was shown that, in response to sheer stress, endothelial cells isolated from hypoxic rats released less ATP, but more endothelin, compared with cells from normoxic rats.<sup>147</sup> It was suggested that, under conditions of reduced arterial oxygen tension, a dynamic balance between ATP and endothelin could regulate the response of vessels to flow.

#### *Chronic Stimulation of Perivascular Nerves In Vivo*

After 10 days of chronic *in vivo* stimulation of perivascular nerves in the rabbit ear artery, the vasoactive peptides NPY and CGRP were shown to appear in subpopulations of endothelial cells, indicating that the level of activity in perivascular nerves has a trophic influence on the expression of peptides in endothelial cells.<sup>148</sup>

#### **Final Comment**

The recent developments in our knowledge of both perivascular nerves and endothelial cells described in this article have profound implications on our understanding of the mechanisms controlling blood flow. It can be envisioned that the status of vascular tone will be the result of interactions between the neural and endothelial control mechanisms. It seems likely that spontaneous release of EDRF is responsible for a resting endothelial-mediated vasodilator tone, which is op-



posed by a resting vasoconstrictor tone mediated by sympathetic nerves. Under different physiologic or pathophysiologic circumstances, the balance may be altered so that one or the other may dominate. It seems likely that endothelial release of vasoactive substances may be of greater significance in the response of blood vessels to local changes in their environment, such as hypoxia and increased flow. In contrast, perivascular nerves may be more concerned with the integrative control of blood flow in the organism as a whole.

## References

1. Burnstock G: The changing face of autonomic neurotransmission. (The First von Euler Lecture in Physiology). *Acta Physiol Scand* 126:67-91, 1986
2. Burnstock G: Autonomic neuromuscular junctions: Current developments and future directions: The Third Anatomical Society Review Lecture. *J Anat* 146:1-30, 1986
3. Burnstock G: Do some nerve cells release more than one transmitter? *Neuroscience* 1:239-248, 1976
4. Burnstock G: The Fifth Heymans Lecture, Gent. Cotransmission. *Arch Int Pharmacodyn Ther* 304:7-33, 1990
5. Furchgott RF, Zawadzki JV: The obligatory role of endothelial cells in the relaxation of arterial smooth muscle by acetylcholine. *Nature* 288:373-376, 1980
6. Vanhoutte PM, Rimele TJ: Role of endothelium in the control of vascular smooth muscle function. *J Physiol (Paris)* 78:681-686, 1983
7. Burnstock G, Kennedy C: A dual function for adenosine 5'-triphosphate in the regulation of vascular tone: Excitatory cotransmitter with noradrenaline from perivascular nerves and locally released inhibitory intravascular agent. *Circ Res* 58:319-330, 1986
8. Burnstock G: Regulation of local blood flow by neurohumoral substances released from perivascular nerves and endothelial cells. *Acta Physiol Scand* 133(suppl):53-59, 1988
9. Burnstock G, Griffith SG: Noradrenergic Innervation of Blood Vessels. Boca Raton, CRC, 1988, Vol I, pp 1-49, Vol II, pp 1-233
10. Dhital KK, Burnstock G: Adrenergic and non-adrenergic neural control of the arterial wall, *Diseases of the Arterial Wall*. Edited by Camilleri J-P, Berry CL, Fiessinger J-N, Bariéty J. London, Springer, 1989, pp 97-126
11. Cuello AC: Co-transmission, Proceedings Symposium 50th Anniversary Meeting British Pharmacology Society, Oxford. London, Macmillan, 1982, p 264
12. Osborne NN: Dale's Principle and Communication between Neurones. Oxford, Pergamon, 1983, p 204
13. Chan-Palay V, Palay SL: Co-existence of Neuroactive Substances in Neurones. New York, Wiley and Sons, 1984, p 433
14. Hökfelt T, Fuxe K, Pernow B: Coexistence of Neuronal Messengers: A New Principle in Chemical Transmission. Progress in Brain Research, volume 68. Amsterdam, Elsevier, 1986
15. Bartfai T, Iverfeldt K, Fisone G: Regulation of the release of coexisting neurotransmitters. *Annu Rev Pharmacol Toxicol* 28:285-310, 1988
16. Kupfermann I: Functional studies of cotransmission. *Physiol Rev* 71:683-732, 1991
17. Furness JB, Costa M: The Enteric Nervous System. Edinburgh, Churchill Livingstone, 1987
18. Burnstock G: Purines as cotransmitters in adrenergic and cholinergic neurones, Coexistence of Neuronal Messengers: A New Principle in Chemical Transmission. Progress in Brain Research, volume 68. Edited by Hökfelt T, Fuxe K, Pernow B. Amsterdam, Elsevier, 1986, pp 193-203
19. Stjärne L: Basic mechanisms and local modulation of nerve-impulse-induced secretion of neurotransmitters from individual sympathetic nerve varicosities. *Rev Physiol Biochem Pharmacol* 112:1-137, 1989
20. Burnstock G: Sympathetic purinergic transmission in small blood vessels. *Trends Pharmacol Sci* 9:116-117, 1988
21. Sneddon P, Burnstock G: ATP as a co-transmitter in rat tail artery. *Eur J Pharmacol* 106:149-152, 1984
22. Bao JX, Eriksson IE, Stjärne L: On pre- and/or postjunctional roles of ATP and an unknown "substance X" as sympathetic co-transmitters in rat tail artery. *Acta Physiol Scand* 135:65-66, 1989
23. Kennedy C, Burnstock G: ATP produces vasodilation via P<sub>1</sub> purinoceptors and vasoconstriction via P<sub>2</sub> purinoceptors in the isolated rabbit central ear artery. *Blood Vessels* 22:145-155, 1985
24. Suzuki H: Electrical responses of smooth muscle cells of the rabbit ear artery to adenosine triphosphate. *J Physiol (Lond)* 359:401-415, 1985
25. Saville VL, Burnstock G: Use of reserpine and 6-hydroxydopamine supports evidence for purinergic cotransmission in the rabbit ear artery. *Eur J Pharmacol* 155:271-277, 1988
26. Muramatsu I, Kigoshi S: Purinergic and non-purinergic innervation in the cerebral arteries of the dog. *Br J Pharmacol* 92:901-908, 1987
27. Ishikawa S: Actions of ATP and  $\alpha,\beta$ -methylene ATP on neuromuscular transmission and smooth muscle membrane of the rabbit and guinea-pig mesenteric arteries. *Br J Pharmacol* 86:777-787, 1985
28. Von Kügelgen I, Starke K: Noradrenaline and adenosine triphosphate as co-transmitters of neurogenic vasoconstriction in rabbit mesenteric artery. *J Physiol (Lond)* 367:435-455, 1985
29. Muramatsu I: Evidence for sympathetic, purinergic transmission in the mesenteric artery of the dog. *Br J Pharmacol* 87:478-480, 1986
30. Ramme D, Regenold JT, Starke K, Busse R, Illes P: Identification of the neuroeffector transmitter in jejunal branches of the rabbit mesenteric artery. *Naunyn Schmiedeberg's Arch Pharmacol* 336:267-273, 1987
31. Muir TC, Wardle KA: The electrical and mechanical basis of co-transmission in some vascular and non-vascular smooth muscles. *J Auton Pharmacol* 8:203-218, 1988
32. Machalay M, Dalziel HH, Sneddon P: Evidence for ATP as a cotransmitter in dog mesenteric artery. *Eur J Pharmacol* 147:83-91, 1988
33. Katsuragi T, Su C: Augmentation by theophylline of [<sup>3</sup>H]purine release from vascular adrenergic nerves: Evidence for presynaptic autoinhibition. *J Pharmacol Exp Ther* 220:152-156, 1982
34. Cheung DW, Fujioka M: Inhibition of the excitatory junction potential in the guinea-pig saphenous artery by ANAPP<sub>3</sub>. *Br J Pharmacol* 89:3-5, 1986
35. Burnstock G, Warland JJI: A pharmacological study of the rabbit saphenous artery *in vitro*: A vessel with a large purinergic contractile response to sympathetic nerve stimulation. *Br J Pharmacol* 90:111-120, 1987

## DUAL CONTROL OF VASCULAR TONE

36. Warland JJI, Burnstock G: Effects of reserpine and 6-hydroxydopamine on the adrenergic and purinergic components of sympathetic nerve responses of the rabbit saphenous artery. *Br J Pharmacol* 92:871-880, 1987
37. Brizzolara AL, Burnstock G: Evidence for noradrenergic-purinergic cotransmission in the hepatic artery of the rabbit. *Br J Pharmacol* 99:835-839, 1990
38. Shimada SG, Stitt JT: An analysis of the purinergic component of active muscle vasodilatation obtained by electrical stimulation of the hypothalamus in rabbits. *Br J Pharmacol* 83:577-589, 1984
39. Taylor EM, Parsons ME: Adrenergic and purinergic neurotransmission in arterial resistance vessels of the cat intestinal circulation. *Eur J Pharmacol* 164:23-33, 1989
40. Schwartz DD, Malik KU: Renal periarterial nerve stimulation-induced vasoconstriction at low frequencies is primarily due to release of a purinergic transmitter in the rat. *J Pharmacol Exp Ther* 250:764-771, 1989
41. Flavahan NA, Vanhoutte P: Sympathetic purinergic vasoconstriction and thermosensitivity in a canine cutaneous vein. *J Pharmacol Exp Ther* 239:784-789, 1986
42. Bulloch JM, McGrath JC: Blockade of vasopressor and vasodepressor responses by  $\alpha,\beta$ -methylene ATP in the pithed rat. *Br J Pharmacol* 94:103-108, 1988
43. Schlicker E, Urbanek E, Göthert M: ATP,  $\alpha,\beta$ -methylene ATP and suramin as tools for characterization of vascular  $P_{2X}$  receptors in the pithed rat. *J Auton Pharmacol* 9:371-380, 1989
44. Kennedy C, Saville VL, Burnstock G: The contributions of noradrenaline and ATP to the responses of the rabbit central ear artery to sympathetic nerve stimulation depend on the parameters of stimulation. *Eur J Pharmacol* 122:291-300, 1986
45. Ramme D, Regenold JT, Starke K, Busse R, Illes P: Identification of the neuroeffector transmitter in jejunal branches of the rabbit mesenteric artery. *Naunyn Schmiedeberg's Arch Pharmacol* 336:267-273, 1987
46. Evans RJ, Surprenant A: Vasoconstriction of guinea-pig submucosal arterioles following sympathetic nerve stimulation is mediated by the release of ATP. *Br J Pharmacol* 106:242-249
47. Burnstock G: Recent concepts of chemical communication between excitable cells, Dale's Principle and Communication Between Neurons. Edited by Osborne NN. Oxford, Pergamon, 1983, pp 7-35
48. Stone TW: Differential blockade of ATP, noradrenaline and electrically evoked contractions of the rat vas deferens by nifedipine. *Eur J Pharmacol* 74:373-376, 1981
49. Mackenzie I, Manzini S, Burnstock G: Regulation of voltage-dependent excitatory responses to  $\alpha,\beta$ -methylene ATP, ATP and non-adrenergic nerve stimulation by dihydropyridines in the guinea-pig vas deferens. *Neuroscience* 27:317-332, 1988
50. Corr L, Burnstock G: Vasodilator response of coronary smooth muscle to the sympathetic co-transmitters noradrenaline and adenosine triphosphate. *Br J Pharmacol* 104:337-342, 1991
51. Lundberg JM, Terenius L, Hökfelt T, Goldstein M: High levels of neuropeptide Y in peripheral noradrenergic neurons in various mammals including man. *Neurosci Lett* 42:167-172, 1983
52. Lundberg JM, Ånggård A, Theodorsson-Norheim E, Pernow J: Guanethidine-sensitive release of neuropeptide Y-like immunoreactivity in the cat spleen by sympathetic nerve stimulation. *Neurosci Lett* 52:175-180, 1984
53. Stjärne L, Lundberg JM, Åstrand P: Neuropeptide Y—A co-transmitter with noradrenaline and adenosine 5'-triphosphate in the sympathetic nerves of the mouse vas deferens? A biochemical, physiological and electropharmacological study. *Neuroscience* 18:151-166, 1986
54. Pernow J, Saria A, Lundberg JM: Mechanisms underlying pre- and postjunctional effects of neuropeptide Y in sympathetic vascular control. *Acta Physiol Scand* 126:239-249, 1986
55. Wahlestedt C, Yanaihara N, Håkanson R: Evidence for different pre- and postjunctional receptors for neuropeptide Y and related peptides. *Regul Pept* 13:307-318, 1986
56. Saville VL, Maynard KI, Burnstock G: Neuropeptide Y potentiates purinergic as well as adrenergic responses of the rabbit ear artery. *Eur J Pharmacol* 176:117-126, 1990
57. Burnstock G: Overview: Purinergic mechanisms. *Ann NY Acad Sci* 603:1-14, 1990
58. Gibbins IL, Morris JL: Sympathetic noradrenergic neurons containing dynorphin but not neuropeptide Y innervate small cutaneous blood vessels of guinea-pigs. *J Auton Nerv Syst* 29:137-150, 1990
59. Griffith SG, Burnstock G: Immunohistochemical demonstration of serotonin in nerves supplying human cerebral and mesenteric blood vessels: Some speculations about their involvement in vascular disorders. *Lancet* i:561-562, 1983
60. Jackowski A, Crookard A, Burnstock G: 5-Hydroxytryptamine demonstrated immunohistochemically in rat cerebrovascular nerves largely represents 5-hydroxytryptamine uptake into sympathetic nerve fibres. *Neuroscience* 29:453-462, 1989
61. Bloom SR, Edwards AV: Vasoactive intestinal polypeptide in relation to atropine resistant vasodilatation in the sub-maxillary gland of the cat. *J Physiol (Lond)* 300:41-53, 1980
62. Lundberg JM: Evidence for coexistence of vasoactive intestinal polypeptide (VIP) and acetylcholine in neurons of cat exocrine glands: Morphological, biochemical and functional studies. *Acta Physiol Scand* 112(suppl):1-57, 1981
63. Furness JB, Papka RE, Della NG, Costa M, Eskay RL: Substance P-like immunoreactivity in nerves associated with the vascular system of guinea-pigs. *Neuroscience* 7:447-459, 1982
64. Duckles SP, Buck SM: Substance P in the cerebral vasculature: Depletion by capsaicin suggests a sensory role. *Brain Res* 245:171-174, 1982
65. Barja F, Mathison R, Huggel M: Substance P-containing nerve fibres in large peripheral blood vessels of the rat. *Cell Tissue Res* 229:411-422, 1983
66. Lundberg JM, Franco-Cereceda A, Hua X, Hökfelt T, Fischer JA: Coexistence of substance P and calcitonin gene-related peptide-like immunoreactivities in sensory nerves in relation to cardiovascular and bronchoconstrictor effects of capsaicin. *Eur J Pharmacol* 108:315-319, 1985
67. Terenghi G, Polak JM, Rodrigo J, Mulderry PK, Bloom SR: Calcitonin gene-related peptide-immunoreactive nerves in the tongue, epiglottis and pharynx of the rat: Occurrence, distribution and origin. *Brain Res* 365:1-14, 1986
68. Jahr CE, Jessel TM: ATP excites a subpopulation of rat dorsal horn neurones. *Nature* 304:730-733, 1983
69. Salt TE, Hill RG: Excitation of single sensory neurones in the rat caudal trigeminal nucleus by iontophoretically applied adenosine 5'-triphosphate. *Neurosci Lett* 35:53-57, 1983
70. Fyffe REW, Perl ER: Is ATP a central synaptic mediator for certain primary afferent fibres from mammalian skin? *Proc Natl Acad Sci USA* 81:6890-6893, 1984

71. Krishtal OA, Marchenko SM, Obukhov AG: Cationic channels activated by extracellular ATP in rat sensory neurons. *Neuroscience* 27:995-1000, 1988
72. Gibbins IL, Furness JB, Costa M, Macintyre I, Hillyard CJ, Girgis S: Co-localization of calcitonin gene-related peptide-like immunoreactivity with substance P in cutaneous, vascular and visceral sensory neurons of guinea-pigs. *Neurosci Lett* 57:125-130, 1985
73. Uddman R, Edvinsson L, Ekman R, Kingman T, McCulloch J: Innervation of the feline cerebral vasculature by nerve fibres containing calcitonin gene-related peptide: Trigeminal origin and co-existence with substance P. *Neurosci Lett* 62:131-136, 1985
74. Gulbenkian S, Merighi A, Wharton J, Varndell IM, Polak JM: Ultrastructural evidence for the coexistence of calcitonin gene-related peptide and substance P in secretory vesicles of peripheral nerves in the guinea pig. *J Neurocytol* 15:535-542, 1986
75. Burnstock G: Autonomic neuroeffector junctions—Reflex vasodilatation of the skin. *J Invest Dermatol* 69:47-57, 1977
76. Maggi CA, Meli A: The sensory-efferent function of capsaicin-sensitive sensory nerves. *Gen Pharmacol* 19:1-43, 1988
77. Rubino A, Ralevic V, Burnstock G: Prejunctional modulation of sensory-motor nerve mediated vasodilation of the rat mesenteric arterial bed by adenosine. *Eur J Pharmacol* 220:95-98, 1992
78. Hassall CJS, Burnstock G: Neuropeptide Y-like immunoreactivity in cultured intrinsic neurones of the heart. *Neurosci Lett* 52:111-115, 1984
79. Hassall CJS, Burnstock G: Intrinsic neurones and associated cells of the guinea-pig heart in culture. *Brain Res* 364:102-113, 1986
80. Corr LA, Aberdeen JA, Milner P, Lincoln J, Burnstock G: Sympathetic and nonsympathetic neuropeptide Y-containing nerves in the rat myocardium and coronary arteries. *Circ Res* 66:1602-1609, 1990
81. Hassall CJS, Saffrey MJ, Belai A, Hoyle CHV, Moules EW, Moss J, Schmidt HHHW, Förstermann U, Burnstock G: Nitric oxide synthase immunoreactivity and NADPH-diaphorase activity in a subpopulation of intrinsic neurones of the guinea pig heart. *Neurosci Lett* 143:65-68, 1992
82. Rand MJ: Nitrgic transmission: Nitric oxide as a mediator of non-adrenergic, non-cholinergic neuro-effector transmission. *Clin Exp Pharmacol Physiol* 19:147-169, 1992
83. Furchgott RF: Role of endothelium in responses of vascular smooth muscle. *Frontiers in Physiological Research*. Edited by Garlick DG, Korner PI. Cambridge, Cambridge University, 1984, pp 116-133
84. Ignarro LJ, Byrns RE, Wood KS: Pharmacological and biochemical properties of endothelium-derived relaxing factor (EDRF): Evidence that it is closely related to nitric oxide (NO) radical. *Circulation* 74(suppl):287, 1986
85. Palmer RMJ, Ferrige AG, Moncada S: Nitric oxide release accounts for the biological activity of endothelium-derived relaxing factor. *Nature* 327:524-526, 1987
86. Yanagisawa M, Kurihara H, Kimura S, Tomobe Y, Kobayashi M, Mitsui Y, Yazaki Y, Goto K, Masaki T: A novel potent vasoconstrictor peptide produced by vascular endothelial cells. *Nature* 332:411-415, 1988
87. Vanhoutte PM, Miller VM: Heterogeneity of endothelium-dependent responses in mammalian blood vessels. *J Cardiovasc Pharmacol* 7(suppl):S12-S23, 1985
88. Mione MC, Ralevic V, Burnstock G: Peptides and vasomotor mechanisms. *Pharmacol Ther* 46:429-468, 1990
89. Burnstock G, Kennedy C: Is there a basis for distinguishing two types of P<sub>2</sub>-purinoceptor? *Gen Pharmacol* 16:433-440, 1985
90. Burnstock G: Local purinergic regulation of blood pressure. (The First John T. Shepherd Lecture), *Vasodilatation: Vascular Smooth Muscle, Peptides, Autonomic Nerves, and Endothelium*. Edited by Vanhoutte PM. New York, Raven, 1988, pp 1-14
91. Parnavelas JG, Kelly W, Burnstock G: Ultrastructural localization of choline acetyltransferase in vascular endothelial cells in rat brain. *Nature* 316:724-725, 1985
92. Loesch A, Burnstock G: Ultrastructural localisation of serotonin and substance P in vascular endothelial cells of rat femoral and mesenteric arteries. *Anat Embryol* 178:137-142, 1988
93. Burnstock G, Lincoln J, Fehér E, Hopwood AM, Kirkpatrick K, Milner P, Ralevic V: Serotonin is localized in endothelial cells of coronary arteries and released during hypoxia: A possible new mechanism for hypoxia-induced vasodilatation of the rat heart. *Experientia* 44:705-707, 1988
94. Milner P, Ralevic V, Hopwood AM, Fehér E, Lincoln J, Kirkpatrick KA, Burnstock G: Ultrastructural localisation of substance P and choline acetyltransferase in endothelial cells of rat coronary artery and release of substance P and acetylcholine during hypoxia. *Experientia* 45:121-125, 1989
95. Lincoln J, Loesch A, Burnstock G: Localization of vasopressin, serotonin and angiotensin II in endothelial cells of the renal and mesenteric arteries of the rat. *Cell Tissue Res* 259:341-344, 1990
96. Linnik MD, Moskowitz MA: Identification of immunoreactive substance P in human and other mammalian endothelial cells. *Peptides* 10:957-962, 1989
97. Kifor I, Dzall VJ: Endothelial renin-angiotensin pathway: Evidence for intracellular synthesis and secretion of angiotensin. *Circ Res* 60:422-428, 1987
98. Hollis TM, Rosen LA: Histidine decarboxylase activities of bovine aortic endothelium and intima-media. *Proc Soc Exp Biol Med* 141:978-981, 1972
99. Paddle BM, Burnstock G: Release of ATP from perfused heart during coronary vasodilatation. *Blood Vessels* 11:110-119, 1974
100. Hopwood AM, Lincoln J, Kirkpatrick KA, Burnstock G: Adenosine 5'-triphosphate, adenosine and endothelium-derived relaxing factor in hypoxic vasodilatation of the heart. *Eur J Pharmacol* 165:323-326, 1989
101. Ralevic V, Kristek F, Hudlická O, Burnstock G: A new protocol for removal of the endothelium from the perfused rat hind-limb preparation. *Circ Res* 64:1190-1196, 1989
102. Ralevic V, Milner P, Hudlická O, Kristek F, Burnstock G: Substance P is released from the endothelium of normal and capsaicin-treated rat hindlimb vasculature, *in vivo*, by increased flow. *Circ Res* 66:1178-1183, 1990
103. Milner P, Kirkpatrick K, Ralevic V, Tothill V, Pearson JD, Burnstock G: Endothelial cells cultured from human umbilical vein release ATP, substance P and acetylcholine in response to altered shear stress. *Proc R Soc Lond B* 241:245-248, 1990
104. De Mey JG, Vanhoutte PM: Anoxia and endothelium-dependent reactivity of the canine femoral artery. *J Physiol (Lond)* 335:65-74, 1983
105. Rubanyi GM, Vanhoutte PM: Hypoxia releases a vasoconstrictor substance from the canine vascular endothelium. *J Physiol (Lond)* 364:45-56, 1985
106. Katusic ZS, Shepherd JT, Vanhoutte PM: Endothelium-dependent contractions to stretch in canine basilar arteries. *Fed Proc* 45:289, 1986

## DUAL CONTROL OF VASCULAR TONE

107. Katusic ZS, Shepherd JT, Vanhoutte PM: Endothelium-dependent contractions to stretch in canine basilar artery. *Am J Physiol* 252:H671-H673, 1987
108. Katusic ZS, Shepherd JT, Vanhoutte PM: Potassium-induced endothelium-dependent rhythmic activity in the canine basilar artery. *J Cardiovasc Pharmacol* 12:37-41, 1987
109. Lansman JB, Hallam TJ, Rink TJ: Single stretch-activated ion channels in vascular endothelial cells as mechanotransducers? *Nature* 325:811-813, 1987
110. Lüscher TF: *Endothelial Vasoactive Substances and Cardiovascular Disease*. Basel, Karger, 1988
111. O'Brien RF, McMurthy TF: Endothelial cell supernates contract bovine pulmonary artery rings. *Am Rev Respir Dis* 129:337, 1984
112. Hickey KA, Rubanyi G, Paul RJ, Highsmith RF: Characterization of a coronary vasoconstrictor produced by cultured endothelial cells. *Am J Physiol* 248:C550-C556, 1985
113. Gillespie MN, Owasoyo JO, McMurtry IF, O'Brien RF: Sustained coronary vasoconstriction provoked by a peptidergic substance released from endothelial cells in culture. *J Pharmacol Exp Ther* 236:339-343, 1986
114. Brain SD, Tippins JR, Williams TJ: Endothelin induces potent microvascular constriction. *Br J Pharmacol* 95:1005-1007, 1988
115. Hughes AD, Schachter M, Hair WM, Sever PS: Endothelin is a potent constrictor of isolated human resistance arteries. *Br J Pharmacol Proc* 95(suppl):722P, 1988
116. Warner T, de Nucci G, Vane JR: Release of EDRF by endothelin in the rat isolated perfused mesentery. *Br J Pharmacol Proc* 95(suppl):723P, 1988
117. Milner P, Bodin P, Loesch A, Burnstock G: Endothelin and ATP but not vasopressin are released from isolated aortic endothelial cells exposed to increased flow. *Biochem Biophys Res Commun* 170:649-656, 1990
118. Hirata Y, Yoshimi H, Takata S, Watanabe TX, Kumagai S, Nakajima K, Sakakibara S: Cellular mechanism of action by a novel vasoconstrictor endothelin in cultured rat vascular smooth muscle cells. *Biochem Biophys Res Commun* 154:868-875, 1988
119. Kohzuki M, Johnston CI, Chai SY, Casley DJ, Mendelsohn FAO: Localization of endothelin receptors in rat kidney. *Eur J Pharmacol* 160:193-194, 1989
120. Power RF, Wharton J, Salas SP, Kanse S, Ghatei M, Bloom SR, Polak JM: Autoradiographic localisation of endothelin binding sites in human and porcine coronary arteries. *Eur J Pharmacol* 160:199-200, 1989
121. Hudlická O: Development of microcirculation: Capillary growth and adaptation, *Handbook of Physiology—The Cardiovascular System*. 165th edition. Volume IV. Bethesda, American Physiological Society, 1984, pp 165-216
122. Burnstock G: Neurohumoral control of blood vessels: Some future directions. *J Cardiovasc Pharmacol* 7:S137-S146, 1985
123. Cowen T, Haven AJ, Wen-Qin C, Gallen DD, Franc F, Burnstock G: Development and aging of perivascular adrenergic nerves in the rabbit: A quantitative fluorescence histochemical study using image analysis. *J Auton Nerv Syst* 5:317-336, 1982
124. Dhital K, Lincoln J, Appenzeller O, Burnstock G: Adrenergic innervation of vasa and nervi nervorum of optic, sciatic, vagus and sympathetic nerve trunks in normal and streptozotocin-diabetic rats. *Brain Res* 367:39-44, 1986
125. Mione MC, Dhital KK, Amenta F, Burnstock G: An increase in the expression of neuropeptidergic vasodilator, but not vasoconstrictor, cerebrovascular nerves in aging rats. *Brain Res* 460:103-113, 1988
126. Mangiarua EI, Bevan RD: Altered endothelium-mediated relaxation after denervation of growing rabbit ear artery. *Eur J Pharmacol* 122:149-152, 1986
127. Aubineau P, Pearce W, Reynier-Rebuffel AM, Cuevas J, Issertial O: Long-term sympathetic denervation increases sensitivity of cerebral arteries to CO<sub>2</sub> and 5-HT in vitro. *J Cereb Blood Flow Metab* 9(suppl):S506-S510, 1989
128. Dimitriadou V, Aubineau P, Taxi J, Seylaz J: Ultrastructural changes in the cerebral artery wall induced by long-term sympathetic denervation. *Blood Vessels* 25:122-143, 1988
129. Taguchi T, Ishii Y, Matsubara F, Tenaka K: Intimal thickening and the distribution of vasomotor nerves in the mechanically injured dog coronary artery. *Exp Mol Pathol* 44:138-146, 1986
130. Lichter T, Davis HR, Johns L, Vesselinovitch D, Wisler RW, Mullan S: The sympathetic nervous system and atherosclerosis. *J Neurosurg* 67:906-914, 1987
131. Dhital KK, Gerli R, Lincoln J, Milner P, Tanganelli P, Weber G, Fruschelli C, Burnstock G: Increased density of perivascular nerves to the major cerebral vessels of the spontaneously hypertensive rat: Differential changes in noradrenaline and neuropeptide Y during development. *Brain Res* 444:33-45, 1988
132. Kährström J, Hardebo JE, Nordberg C, Owman C: Experiments on cerebrovascular nerve plasticity and trophic vascular adaption in young and adult rats, *Neural Regulation of Brain Circulation*. Edited by Owman C, Hardebo JE. Amsterdam, Elsevier, 1986, pp 589-606
133. Cole DF, Bloom SR, Burnstock G, Butler JM, McGregor GP, Saffrey MJ, Unger WG, Zhang SQ: Increase in SP-like immunoreactivity in nerve fibres of rabbit iris and ciliary body one to four months following sympathetic denervation. *Exp Eye Res* 37:191-197, 1983
134. Schon F, Ghatei M, Allen JM, Mulderry PK, Kelly JS, Bloom SR: The effect of sympathectomy on calcitonin gene-related peptide levels in the rat trigemino-vascular system. *Brain Res* 348:197-200, 1985
135. Gibbins IL, Morris JL: Co-existence of immunoreactivity to neuropeptide Y and vasoactive intestinal polypeptide in non-adrenergic axons innervating guinea-pig cerebral arteries after sympathectomy. *Brain Res* 444:402-406, 1988
136. Aberdeen J, Corr L, Milner P, Lincoln J, Burnstock G: Marked increases in calcitonin gene-related peptide-containing nerves in the developing rat following long-term sympathectomy with guanethidine. *Neuroscience* 35:175-184, 1990
137. Bell C: Dual vasoconstrictor and vasodilator innervation of the uterine arterial supply in guinea-pig. *Circ Res* 23:279-289, 1968
138. Mione MC, Cavallotti C, Burnstock G, Amenta F: The peptidergic innervation of the guinea pig uterine artery in pregnancy. *Basic Appl Histochem* 32:153-159, 1988
139. Dhali U, Cowen T, Haven AJ, Burnstock G: Effect of oestrogen and progesterone on noradrenergic nerves and on nerves showing serotonin-like immunoreactivity in the basilar artery of the rabbit. *Brain Res* 442:335-339, 1988
140. Crowe R, Lincoln J, Blacklay PF, Pryor JP, Lumley JSP, Burnstock G: Vasoactive intestinal polypeptide-like immunoreactive nerves in diabetic penis: A comparison between streptozotocin-treated rats and man. *Diabetes* 32:1075-1077, 1983
141. Lincoln J, Crowe R, Blacklay PF, Pryor JP, Lumley JSP, Burn-

stock G: Changes in the VIPergic, cholinergic and adrenergic innervation of human penile tissue in diabetic and non-diabetic impotent males. *J Urol* 137:1053–1059, 1987

142. Blanco R, de Tejada IS, Goldstein I, Krane RJ, Wotiz HH, Cohen RA: Dysfunctional penile cholinergic nerves in diabetic impotent men. *J Urol* 144:278–280, 1990

143. Lagnado MJ, Crowe R, Lincoln J, Burnstock G: Reduction of nerves containing vasoactive intestinal polypeptide and serotonin, but not neuropeptide Y and catecholamine, in cerebral blood vessels of the 8-week streptozotocin-induced diabetic rat. *Blood Vessels* 24: 169–180, 1987

144. Taylor PD, McCarthy AL, Thomas CR, Poston L: Endothelium-dependent relaxation and noradrenaline sensitivity in mesenteric resistance arteries of streptozotocin-induced diabetic rats. *Br J Pharmacol* 107:393–399, 1992

145. Burnstock G, Stewart-Lee AL, Brizzolara AL, Tomlinson A, Corr L: Dual control by nerves and endothelial cells of arterial blood

flow in atherosclerosis, *Atherosclerotic Plaques*. Edited by Wissler RW, Bond MG, Mercuri M, Tanganelli P. New York, Plenum, 1991, pp 285–292

146. Brizzolara AL, Tomlinson A, Aberdeen J, Gourdie RG, Burnstock G: Sex and age as factors influencing the vascular reactivity in Watanabe heritable hyperlipidaemic (WHHL) rabbits: A pharmacological and morphological study of the hepatic artery. *J Cardiovasc Pharmacol* 19:86–95, 1992

147. Bodin P, Milner P, Winter R, Burnstock G: Chronic hypoxia changes the ratio of endothelin to ATP release from rat aortic endothelial cells exposed to high flow. *Proc R Soc Lond [Biol]* 247: 131–135, 1992

148. Loesch A, Maynard KI, Burnstock G: CGRP- and NPY-like immunoreactivity in endothelial cells after long-term stimulation of perivascular nerves. *Neuroscience* 48:723–736, 1992

149. Burnstock G: Vascular control by purines with emphasis on the coronary system. *Eur Heart J* 10:15–21, 1989
